# Supplementary material for: Satellite-derived sulphur dioxide (SO 2 ) emissions from the 2014–2015 Holuhraun eruption (Iceland)
Source: Copernicus journal article supplement (doi:10.5194/acp-2018-285), 2018-04-16
Supplement: Supplementary file 1 [file acp-2018-285-supplement.zip › Carboni-supporting_information.pdf]

Supporting Information for

**Satellite-derived sulfur dioxide (SO<sub>2</sub>) emissions from the**

**2 2014-2015 Holuhraun eruption (Iceland)**

E. Carboni<sup>1</sup>, T. A. Mather<sup>2</sup>, A. Schmidt<sup>3,4</sup>, R. G. Grainger<sup>1</sup>, M. A. Pfeffer<sup>5</sup>, I. Ialongo<sup>6</sup>

1 COMET, Atmospheric, Oceanic and Planetary Physics, University of Oxford, Clarendon Laboratory, Parks Road, Oxford, OX1 3PU, UK.

2 COMET, Department of Earth Science, University of Oxford, South Park Road, Oxford OX1 3AN, UK.

3 Department of Chemistry, University of Cambridge, Cambridge, CB2 1EW, UK

4 Department of Geography, University of Cambridge, Downing Place, Cambridge CB2 3EN, UK

5 Icelandic Meteorological Office, Bustadavegur 7-9, Reykjavik, Iceland

6 Space and Earth Observation Centre, Finnish Meteorological Institute, Helsinki, Finland

## **Introduction**

This supporting information includes an animation showing the output of the IASI SO<sub>2</sub> retrieval during the period from September 2014 to February 2015 and from 30°N to 90°N.

The retrieval results, from Metop-A orbits, are combined to produce maps of retrieved SO<sub>2</sub> amount (in DU) and altitude (in pressure). The animation shows the evolution of the plume for each day.

**Movie S1.** Evolution of the SO<sub>2</sub> plume from IASI retrieval. For each day retrieval results, from Metop-A data, are combined to show column amount (in DU) on the left and altitude (in pressure) on the right.
