# Supplementary figures and images for: Satellite-derived sulphur dioxide (SO 2 ) emissions from the 2014–2015 Holuhraun eruption (Iceland)
Source: Copernicus journal article supplement (doi:10.5194/acp-2018-285), 2018-04-16

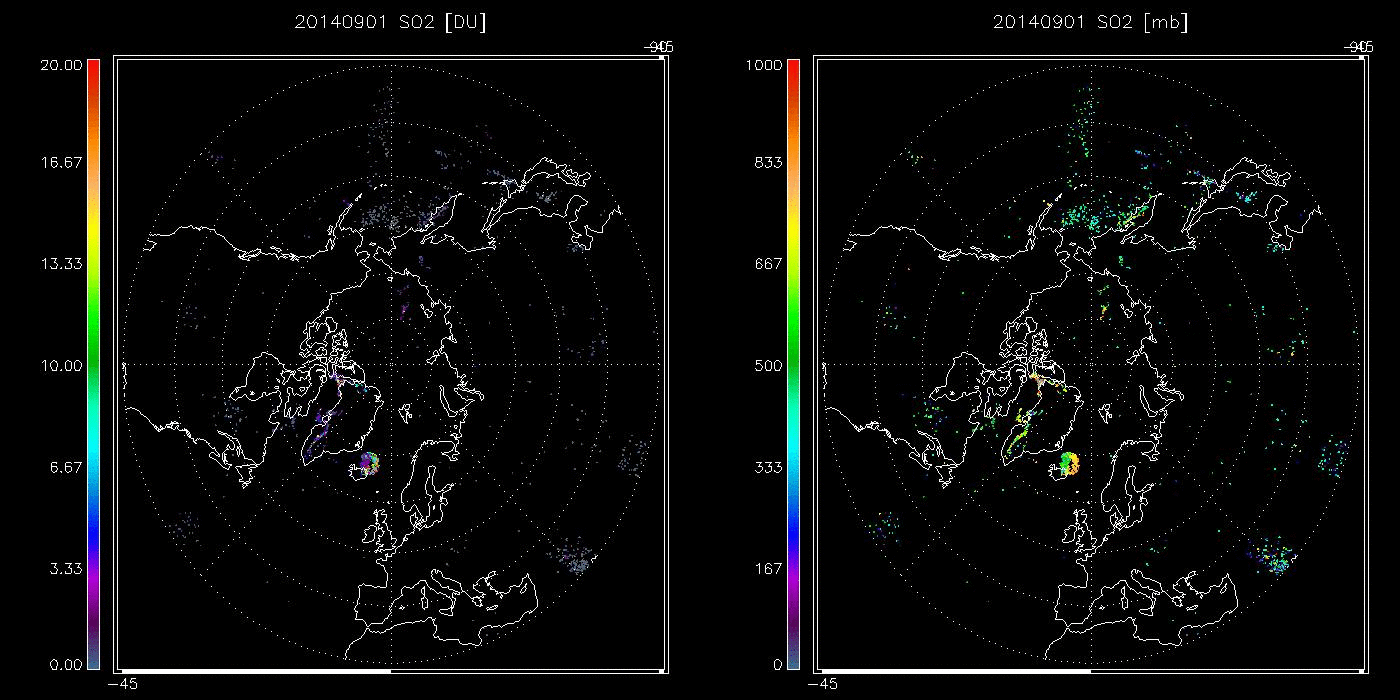

Supplement: Supplementary file 1 [file acp-2018-285-supplement.zip › ms01.gif]
